# Supplementary material
Source: PubMed Central journal article supplement (PMC1748268)

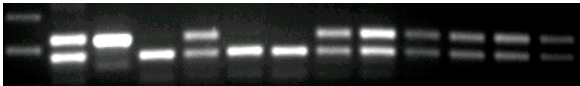

*UCW98*

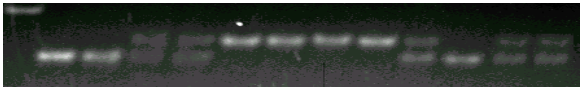

*HvFT*

**M W W H H S S S S H W S S**

*VRN-H3*

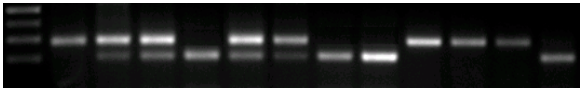

*UCW99*

Supplement: pnas_0607142103_1.pdf [file pnas_0607142103_1.pdf]

# Barley physical map

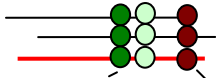

*UCW*   *UCW*   *UCW*  
98   116   120

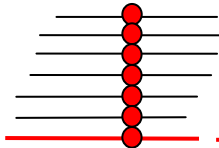

*HvFT*

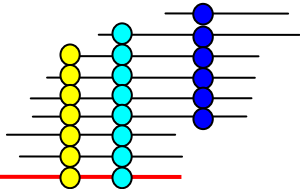

*UCW*   *UCW*   *UCW*  
118   117   99

Supplement: pnas_0607142103_2.pdf [file pnas_0607142103_2.pdf]

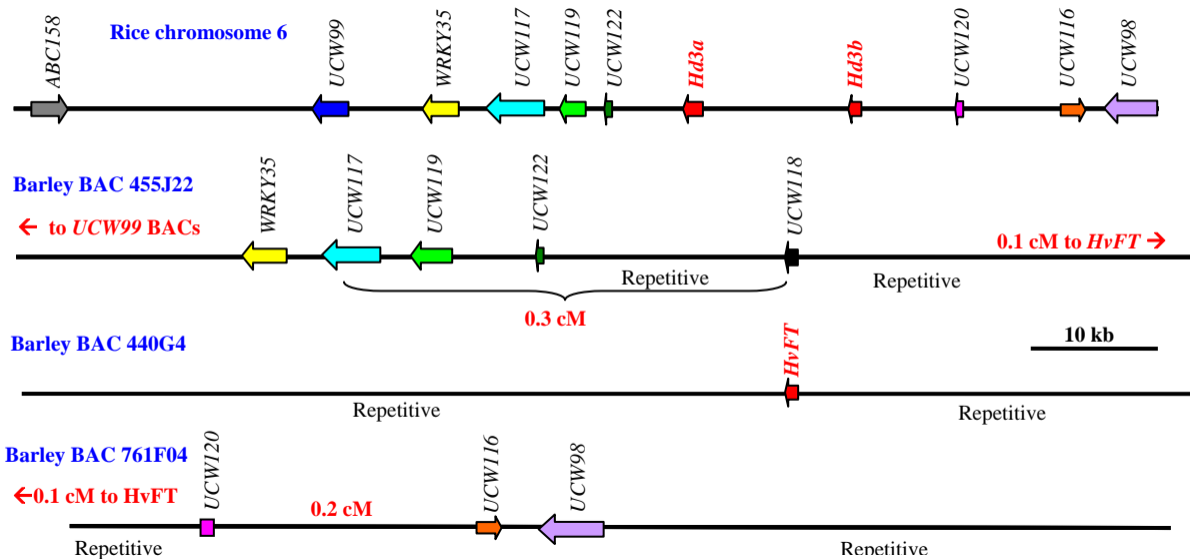

Supplement: pnas_0607142103_3.pdf [file pnas_0607142103_3.pdf]

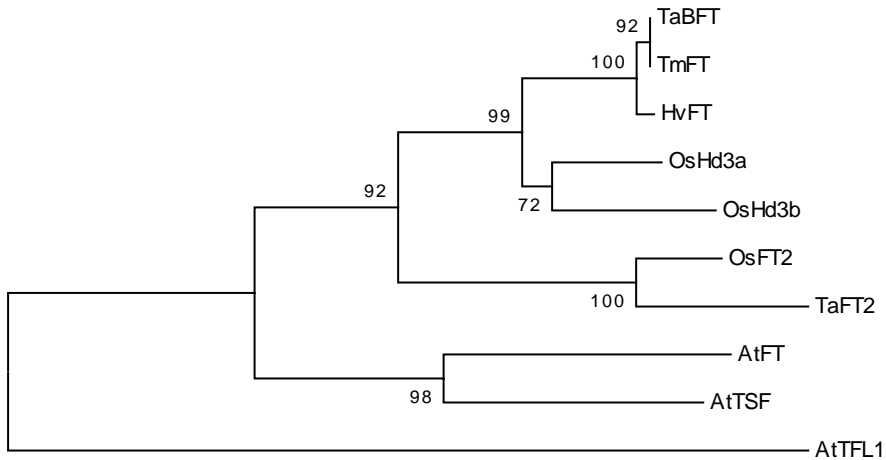

0.05

Supplement: pnas_0607142103_4.pdf [file pnas_0607142103_4.pdf]

### Transcript levels under LD

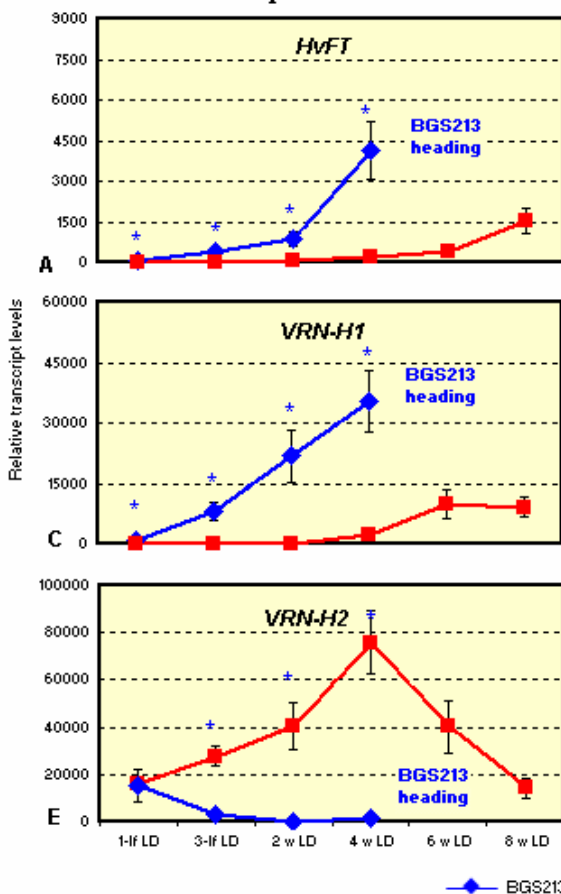

### Transcript levels under SD (except last point)

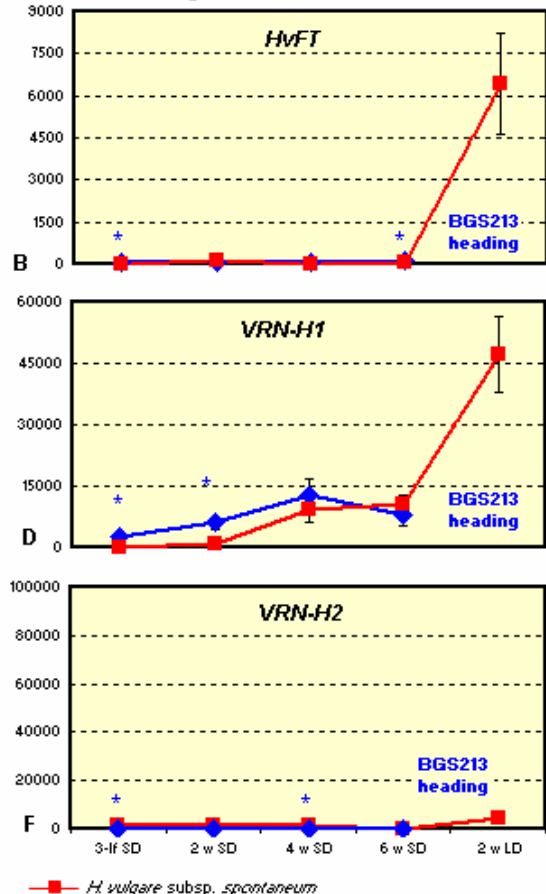

Supplement: pnas_0607142103_7.pdf [file pnas_0607142103_7.pdf]

Interaction *HvFT* - vernalization in barley

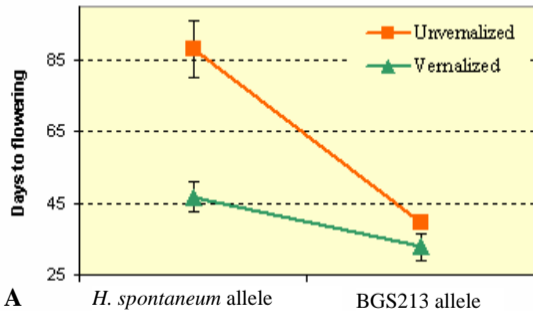

Interaction *TaFT* - vernalization in wheat

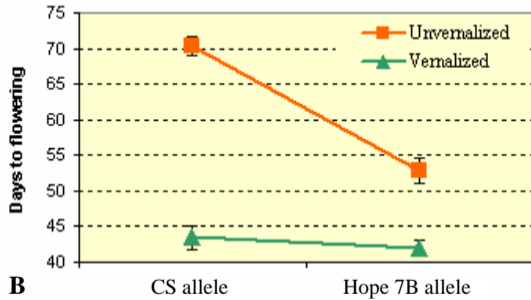

Supplement: pnas_0607142103_8.pdf [file pnas_0607142103_8.pdf]

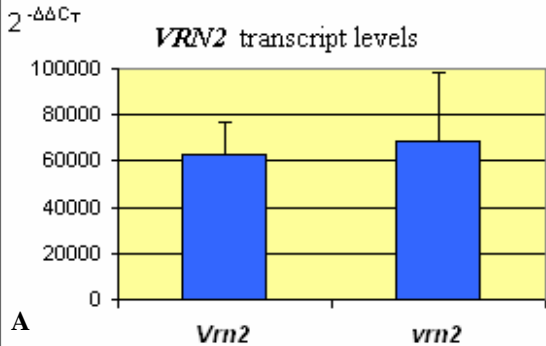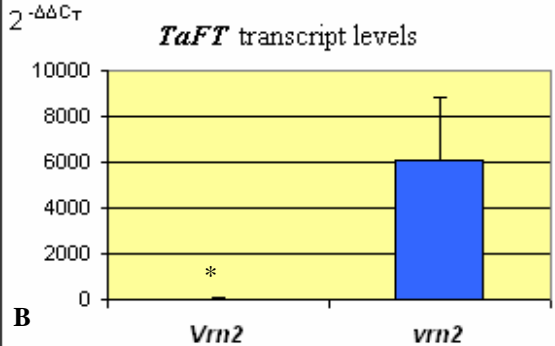

Supplement: pnas_0607142103_9.pdf [file pnas_0607142103_9.pdf]
